# Supplementary material for: Single-cell impedance spectroscopy of nucleated cells
Source: Royal Society of Chemistry journal article supplement (doi:10.1039/d5lc00111k), 2025-01-01
Supplement: d5lc00111k1.pdf [file d5lc00111k1.pdf]

# Single-Cell Impedance Spectroscopy of Nucleated Cells

Xueping Zou<sup>1</sup>, Daniel C. Spencer<sup>1</sup> and Hywel Morgan<sup>1,2\*</sup>

<sup>1</sup>School of Electronics and Computer Science, and <sup>2</sup>Institute for Life Sciences, University of Southampton, Southampton SO17 1BJ, UK

\*Corresponding Author: hm@ecs.soton.ac.uk

## Support Information

### Double-shell model:

The cell complex permittivity can be modelled as a series of concentric shells as illustrated in Figure 1(a), showing the double-shell model applied to a nucleated cell. This model relates the dielectric parameters of each individual shell to the complex dielectric properties of the cell according to [1,2]:

$$\varepsilon_{cell}^* = \varepsilon_1^* \frac{2(1-\gamma_a) + (1+2\gamma_a)E_a}{(2+\gamma_a) + (1-\gamma_a)E_a}$$

The subscript “1” indicates the cell membrane. The factor  $\gamma_a$  is given by  $\gamma_a = (R_a/r_{cell})^3$ , with  $r_{cell}$  the cell radius,  $d_1$  is the thickness of the cell membrane and  $R_a = r_{cell} - d_1$ .

The parameter  $E_a$  is given by:

$$E_a = \frac{\varepsilon_2^* \frac{2(1-\gamma_b) + (1+2\gamma_b)E_b}{(2+\gamma_b) + (1-\gamma_b)E_b}}{\varepsilon_1^*}$$

Here the subscript “2” stands for cytoplasm,  $\gamma_b = (R_b/R_a)^3$ , with  $R_b$  the radius of the nucleus and

$$E_b = \frac{\varepsilon_3^* \frac{2(1-\gamma_c) + (1+2\gamma_c)E_c}{(2+\gamma_c) + (1-\gamma_c)E_c}}{\varepsilon_2^*}$$

The subscript “3” is the nuclear envelope,  $\gamma_c = (R_c/R_b)^3$ , with  $R_c = R_b - d_3$  and  $d_3$  the thickness of the nuclear envelope. Finally,  $E_c$  is:

$$E_c = \frac{\varepsilon_4^*}{\varepsilon_3^*}$$

with subscript “4” refers to the nucleoplasm.

|                                                | Double shell model        | Single shell model        |
|------------------------------------------------|---------------------------|---------------------------|
| Cell parameter                                 | Value                     | Value                     |
| Cell membrane thickness ( $d_1$ )              | 5 nm                      | 5 nm                      |
| Cell nuclear envelope thickness ( $d_3$ )      | 20 nm                     |                           |
| Volume ratio of nucleus and cell               | 0.3                       |                           |
| Cell membrane conductivity ( $\sigma_1$ )      | $3.14 \times 10^{-5}$ S/m | $3.14 \times 10^{-5}$ S/m |
| Cytoplasm permittivity ( $\epsilon_2$ )        | $60\epsilon_0$            | $60\epsilon_0$            |
| Nuclear envelope conductivity ( $\sigma_3$ )   | $3 \times 10^{-3}$ S/m    |                           |
| Nuclear envelope permittivity ( $\epsilon_3$ ) | $52\epsilon_0$            |                           |
| Nucleoplasm conductivity ( $\sigma_4$ )        | 0.82 S/m                  |                           |
| Nucleoplasm permittivity ( $\epsilon_4$ )      | $120\epsilon_0$           |                           |

Table S1. Parameters used for the double-shell and single-shell model simulation in Figure 1 and Figure S1. Cell dielectric parameters are from [1].

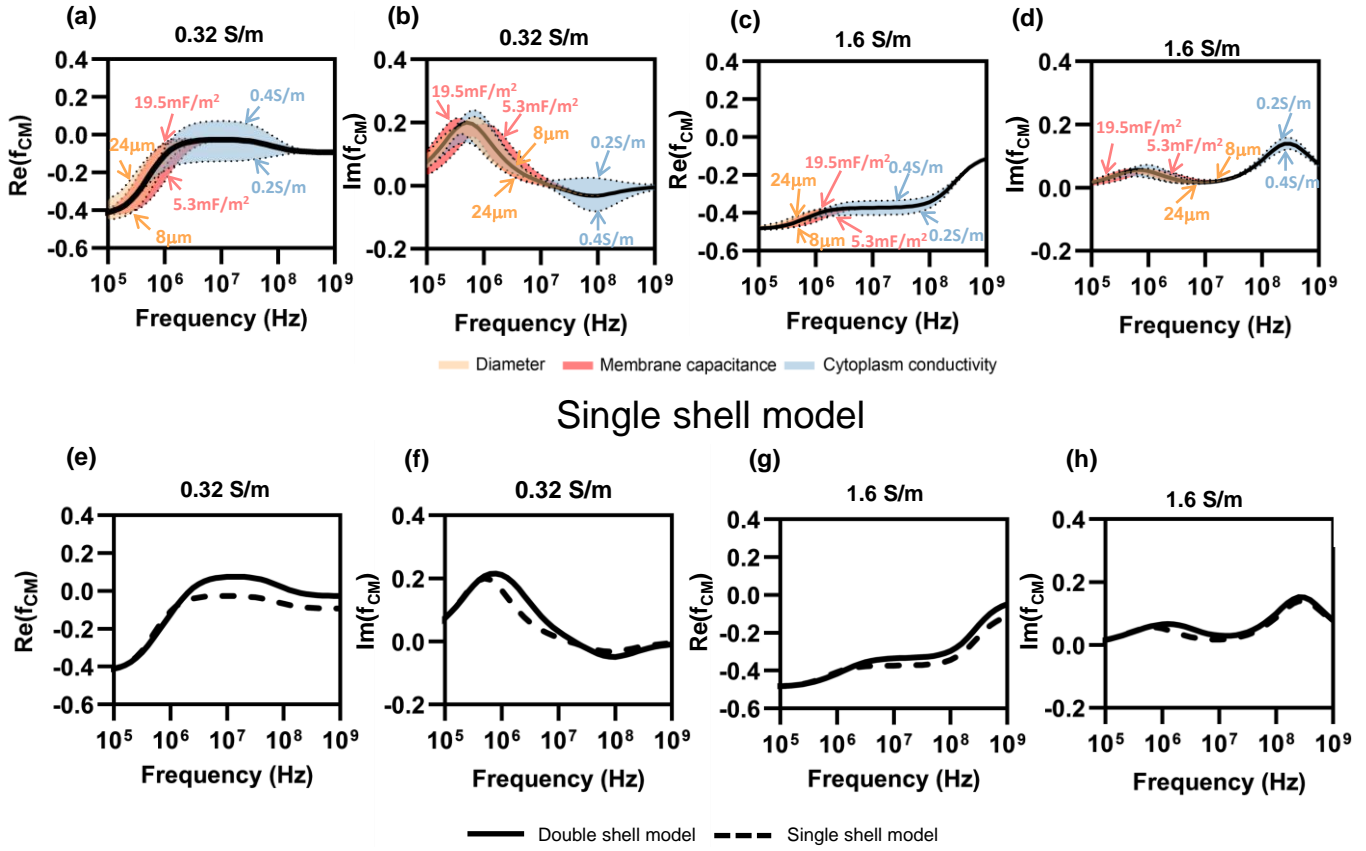

Figure S1. (a) and (b) are real part and imaginary part of normalised  $f_{CM}^*$  spectra in 0.32 S/m saline, calculated from single-shell model. (c) and (d) are real and imaginary parts in physiological saline with single-shell model. (e)-(h) Comparison of the double-shell model and single-shell model. These solid black lines are calculated curves for typical values of cell parameters: diameter = 12  $\mu m$ ; membrane capacitance = 12.4 mF/m<sup>2</sup>; cytoplasm conductivity = 0.3 S/m (for other parameters, see Table S1).

## Electronic Circuit

The microfluidic impedance chip is driven with AC signals of variable frequency with inverted phases  $V_{in+}$  and  $V_{in-}$  (see Ref 12 main manuscript). The output from the chip is connected to a fully differential amplifier with high gain bandwidth. The output current is amplified in a symmetric common-mode feedback configuration, to give a differential signal ( $V_{out+}$  -  $V_{out-}$ ).  $R_I$  is the channel resistance and  $R_f$  the feedback resistor.

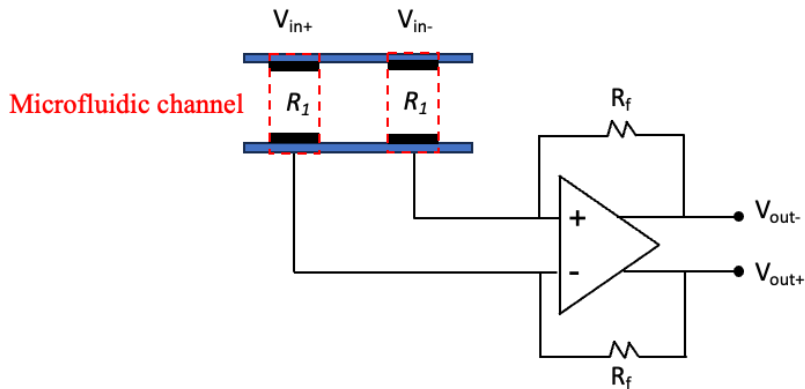

Figure S2. Circuit for a fully differential amplifier. Inputs  $V_{in+}$  and  $V_{in-}$  are inverted phases. The differential signal is amplified with common-mode feedback, giving outputs  $V_{out+}$  and  $V_{out-}$ .

| Cell parameter                                 | Set parameter range                                                | Initial value                                                  |
|------------------------------------------------|--------------------------------------------------------------------|----------------------------------------------------------------|
| Volume ratio of cell and bead                  | 5~25 (5 $\mu$ m diameter bead), 2.6~8.6 (7 $\mu$ m diameter bead), | 13.8 (5 $\mu$ m diameter bead), 5.6 (7 $\mu$ m diameter bead), |
| Volume ratio of nucleus and cell               | 0.3~0.8                                                            | 0.6                                                            |
| Cell membrane permittivity ( $\epsilon_l$ )    | 2~15 $\epsilon_0$                                                  | 7 $\epsilon_0$                                                 |
| Cytoplasm conductivity ( $\sigma_2$ )          | 0.001~0.4 S/m                                                      | 0.015 S/m                                                      |
| Cytoplasm permittivity ( $\epsilon_2$ )        | 40~160 $\epsilon_0$                                                | 90 $\epsilon_0$                                                |
| Nuclear envelope conductivity ( $\sigma_3$ )   | 10 <sup>-4</sup> ~10 <sup>-2</sup> S/m                             | 0.003 S/m                                                      |
| Nuclear envelope permittivity ( $\epsilon_3$ ) | 1~200 $\epsilon_0$                                                 | 30 $\epsilon_0$                                                |
| Nucleoplasm conductivity ( $\sigma_4$ )        | 0.1~2 S/m                                                          | 1.8 S/m                                                        |
| Nucleoplasm permittivity ( $\epsilon_4$ )      | 20~150 $\epsilon_0$                                                | 70 $\epsilon_0$                                                |

Table S2. The initial values and range of cell parameters used for the “pattern-search” algorithm in MATLAB.

Chip Fabrication

The cytometry chip fabrication process has been previously described [3, 4]. Chips were fabricated using the process flow shown in Figure S3 below. The electrodes are made from a 200nm thick layer of Pt with a 20nm Ti adhesion layer, patterned by standard photolithography on 700μm thick 150mm diameter glass wafers. The microchannel is made using a thick photoresist, 30μm high and 40μm wide. Two wafers are bonded using a thermo-compression bonding process. The bonded wafer is diced to release individual chips, each 15mm x 15mm. Access holes are drilled using a laser. The chip is mounted in a custom PEEK holder with fluidic and electrical connections

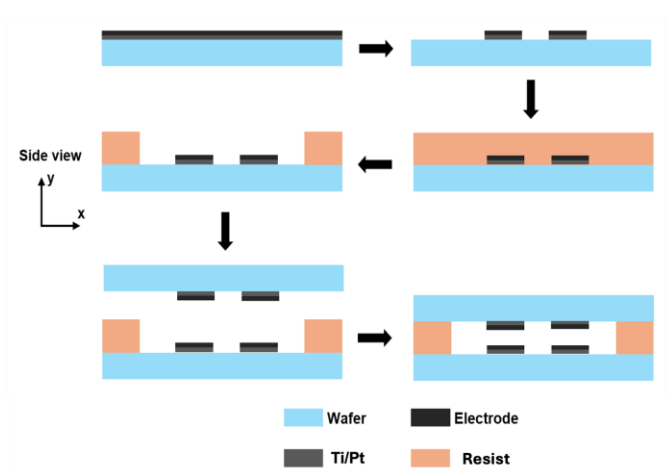

Figure S3. Microfluidic chip fabrication process flow. Electrodes are patterned on a wafer by photolithography and the microfluidic channel is created using Perminex resist\*.

**SNR (signal-noise-ratio) definition:**

The impedance SNR is defined as the mean square ratio of the noise to particle impedance. The impedance signal is collected simultaneously at two frequencies, 18MHz and 15.9MHz. 18MHz is set as a fixed reference frequency and is used to gate the beads and cells. After gating the noise, beads and cells subpopulations (Figure S4), the SNR (for beads and cells) can be determined as follows:

$$\text{SNR}_{\text{bead}} = 10 \times \log_{10} \left( \frac{\text{mean square}(\text{beads})}{\text{mean square}(\text{noise})} \right) = 10 \times \log_{10} \left( \frac{23.4}{3.3} \right) = 8.5 \text{ dB}$$
$$\text{SNR}_{\text{cell}} = 10 \times \log_{10} \left( \frac{\text{mean square}(\text{cells})}{\text{mean square}(\text{noise})} \right) = 10 \times \log_{10} \left( \frac{45.9}{3.3} \right) = 11.4 \text{ dB}$$

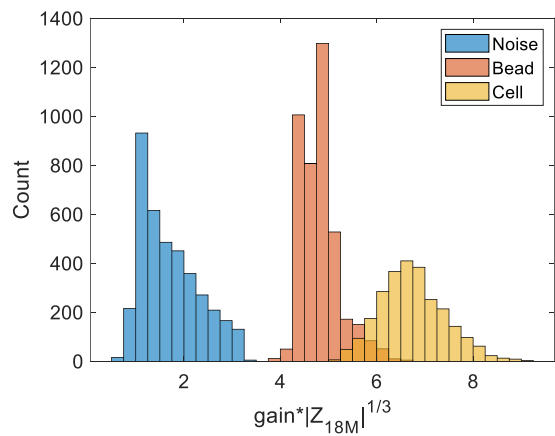

Figure S4. Histogram of Gain ×  $\sqrt[3]{|Z_{18\text{MHz}}|}$  for noise (blue), beads (orange) and cells (yellow).

| 252kHz | 399kHz | 631kHz | 1MHz  | 1.6MHz | 2.5MHz | 3.9MHz | 6.3MHz | 10MHz  |
|--------|--------|--------|-------|--------|--------|--------|--------|--------|
| 4795   | 4710   | 4497   | 4412  | 4225   | 4022   | 3646   | 3269   | 3119   |
| 16MHz  | 25MHz  | 39MHz  | 63MHz | 100MHz | 158MHz | 251MHz | 398MHz | 550MHz |
| 2690   | 2457   | 2677   | 3297  | 3857   | 3529   | 3531   | 2689   | 2971   |

Table S3. Number of cells for untreated group (0.32 S/m ) at each frequency point in Figure 3.

| 0.32 S/m <b>Untreated</b> HL60 using population mean method |                                |          |                      |
|-------------------------------------------------------------|--------------------------------|----------|----------------------|
|                                                             | $C_{mem}$ (mF/m <sup>2</sup> ) | $R$ (μm) | $\sigma_{cyt}$ (S/m) |
| Repeat 1                                                    | 9.62                           | 12.25    | 0.265                |
| Repeat 2                                                    | 9.14                           | 12.00    | 0.334                |
| Repeat3                                                     | 9.07                           | 12.47    | 0.283                |
| mean                                                        | 9.28                           | 12.24    | 0.294                |
| SD                                                          | 0.30                           | 0.24     | 0.036                |

| 0.32 S/m <b>Fixed</b> HL60 using population mean method |                                |          |                      |
|---------------------------------------------------------|--------------------------------|----------|----------------------|
|                                                         | $C_{mem}$ (mF/m <sup>2</sup> ) | $R$ (μm) | $\sigma_{cyt}$ (S/m) |
| Repeat 1                                                | 6.27                           | 12.77    | 0.078                |
| Repeat 2                                                | 6.32                           | 12.62    | 0.074                |
| Repeat 3                                                | 6.28                           | 12.41    | 0.101                |
| mean                                                    | 6.29                           | 12.60    | 0.084                |
| SD                                                      | 0.03                           | 0.18     | 0.015                |

Table S4. Fit results for three repeat experiments using the population mean method for untreated and fixed cells suspended in 0.32 S/m saline. The results from “Repeat 2” are presented in the main text.

Single-shell Model Fit Example:

A comparison of the fit between the double-shell and single-shell models was done using the dataset for untreated HL60 cells suspended in 0.32 S/m saline (**Figure 3** and **Table 1** main text). In comparing the single shell fit, the parameter ranges and initial values for “Volume ratio of cell and bead”, “Cell membrane permittivity ( $\epsilon_l$ )”, “Cytoplasm conductivity ( $\sigma_2$ )”, “Cytoplasm permittivity ( $\epsilon_2$ )” and “Cell membrane conductivity ( $\sigma_l$ )” were set to be the same as the double-shell model (**Table S2**). It is clear from Figure S5 that the fit is poor when using the single shell model for the same parameter set ( $R^2<0.9$ ). Furthermore, the fitted parameters, (cytoplasm conductivity etc), are far from realistic values. This demonstrates that for nucleated cells such as HL60, the single-shell model cannot be used to fit the impedance data.

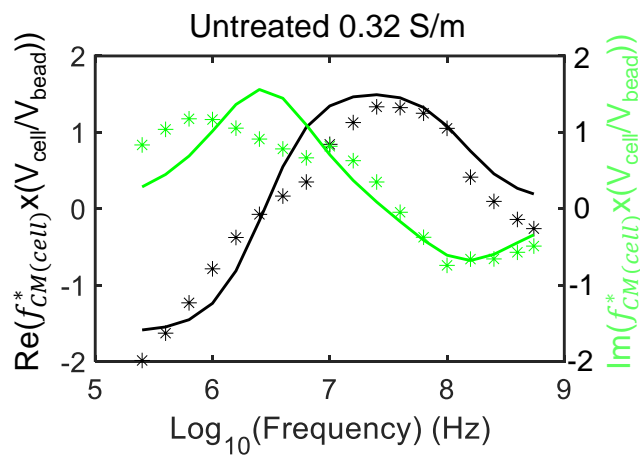

Figure S5. Normalised Clausius-Mossotti factor and a single-shell model fit for HL 60 cells. Black and green stars are real and imaginary parts of the data for cells suspended 0.32 S/m saline. The dataset is the same as used for the double-shell model fit in the main text. Black and green curves are fits for the real and imaginary parts.

| Untreated   |              | $d$<br>( $\mu\text{m}$ ) | $C_{mem}$<br>( $\text{mF}/\text{m}^2$ ) | $\sigma_{cyt}$<br>( $\text{S}/\text{m}$ ) | Real part $R^2$ | Imaginary part $R^2$ |
|-------------|--------------|--------------------------|-----------------------------------------|-------------------------------------------|-----------------|----------------------|
| 0.32<br>S/m | Single shell | 10.5                     | 4.63                                    | 1.32                                      | 0.867           | 0.744                |
|             | Double shell | 12.0                     | 9.14                                    | 0.33                                      | 0.995           | 0.985                |

Table S5 Fit outputs for cell diameter ( $d$ ), membrane capacitance ( $C_{mem}$ ) and cytoplasm conductivity ( $\sigma_{cyt}$ ) for untreated HL60 cells suspended in 0.32 S/m saline using the single-shell and double-shell models. The results for the double-shell model are summarised in Table 1, main text.



## Residual

In order to determine the frequency at which the  $f_{CM}$  is statistically significantly different between normal (N) and CytoD (CD) treated cells, we defined a simple metric - “residual” as shown below:

$$\text{Residual real part: } errR = |\text{Re}(CD\_f_i) - \text{Re}(N\_f_i)|;$$

$$\text{Residual imaginary part: } errI = |\text{Im}(CD\_f_i) - \text{Im}(N\_f_i)|$$

$$\text{Residual} = \frac{\sqrt{(errR)^2 + (errI)^2}}{\sqrt{\text{Re}(N\_f_i)^2 + \text{Im}(N\_f_i)^2}} \times 100\%$$

The largest residual is 25.6% at 6.3MHz.

## Confidence Interval (CI) Evaluation:

The confidence interval (CI) of the parameters returned from the algorithm “patternsearch” was evaluated using bootstrap, widely used in non-linear fitting. The concept involves resampling the elements in the residual set with  $\{r_i^*\}$  the difference between measured and fitted, given by

$$r_i^* = (f_{CM}^*)_{i(measure)} - (f_{CM}^*)_{i(fitted)}$$

where “ $i$ ” stands for the  $i^{\text{th}}$  frequency of the measurement. The new set of residuals  $\{r_{i(resample)}^*\}$  is generated by resampling  $r_i^*$  with a replacement data. This is done by randomly generating a new set of  $n$  ( $i \in 0 \sim n$ ) residuals, where each of  $n$  frequencies is one of the original residuals chosen with equal probability. Typically, some of the original residuals  $r_i^*$  can be chosen more than once, while some are not chosen at all.

The resampled residual  $r_{i(resample)}^*$  is then added to its corresponding fitted response  $(f_{CM}^*)_{i(fitted)}$ , producing a new bootstrap dataset  $\{(f_{CM}^*)_{i(bootstrap)}\}$ , given by

$$(f_{CM}^*)_{i(bootstrap)} = (f_{CM}^*)_{i(fitted)} + r_{i(resample)}^*$$

The  $\{(f_{CM}^*)_{i(bootstrap)}\}$  dataset is treated as an independent replicate experiment which is fitted to the model to calculate new estimates of model parameters giving new values of  $d$ ,  $C_{mem}$  and  $\sigma_{cyt}$ .

For each group of cells, 1,000 new bootstrap datasets of the 18 frequency spectrum (“population-mean” method) and or 8 frequency spectrum (“single-cell” method) were generated and fitted using the “patternsearch” function 1,000 times. The initial values of the fitting parameters were set to the best-fit output. The 95% CI of  $d$ ,  $C_{mem}$  and  $\sigma_{cyt}$  are given in the tables below.

| CI for Table 1 |           | Diameter ( $d$ , $\mu\text{m}$ ) | Membrane capacitance<br>( $C_{mem}$ , $\text{mF}/\text{m}^2$ ) | Cytoplasm conductivity<br>( $\sigma_{cyt}$ , $\text{S}/\text{m}$ ) |
|----------------|-----------|----------------------------------|----------------------------------------------------------------|--------------------------------------------------------------------|
| 1.6 S/m        | Untreated | [11.54, 11.64]                   | [10.00, 12.01]                                                 | [0.28, 0.34]                                                       |
|                | Fixed     | [11.61, 11.77]                   | [9.68, 13.10]                                                  | [0.28, 0.37]                                                       |
| 0.32 S/m       | Untreated | [11.74, 12.27]                   | [8.48, 10.28]                                                  | [0.25, 0.37]                                                       |
|                | Fixed     | [12.51, 12.75]                   | [5.63, 6.96]                                                   | [0.073, 0.081]                                                     |
|                | CytoD     | [11.56, 11.90]                   | [6.54, 7.78]                                                   | [0.32, 0.40]                                                       |

Table S6. CI for Table 1 in main text.

| CI for Table 2 |           | Diameter ( $d$ , $\text{mm}$ ) | Membrane capacitance<br>( $C_{mem}$ , $\text{mF}/\text{m}^2$ ) | Cytoplasm conductivity<br>( $\sigma_{cyt}$ , $\text{S}/\text{m}$ ) |
|----------------|-----------|--------------------------------|----------------------------------------------------------------|--------------------------------------------------------------------|
| 0.32 S/m       | Untreated | [12.32, 12.66]                 | [9.74, 10.99]                                                  | [0.20, 0.26]                                                       |
|                | Fixed     | [10.89, 11.62]                 | [4.55, 10.65]                                                  | [0.055, 0.078]                                                     |
| 1.6 S/m        | Untreated | [11.37, 11.48]                 | [9.52, 11.39]                                                  | [0.30, 0.42]                                                       |
|                | Fixed     | [11.55, 11.64]                 | [8.83, 9.92]                                                   | [0.38, 0.48]                                                       |

Table S7. CI for Table 2 in main text.

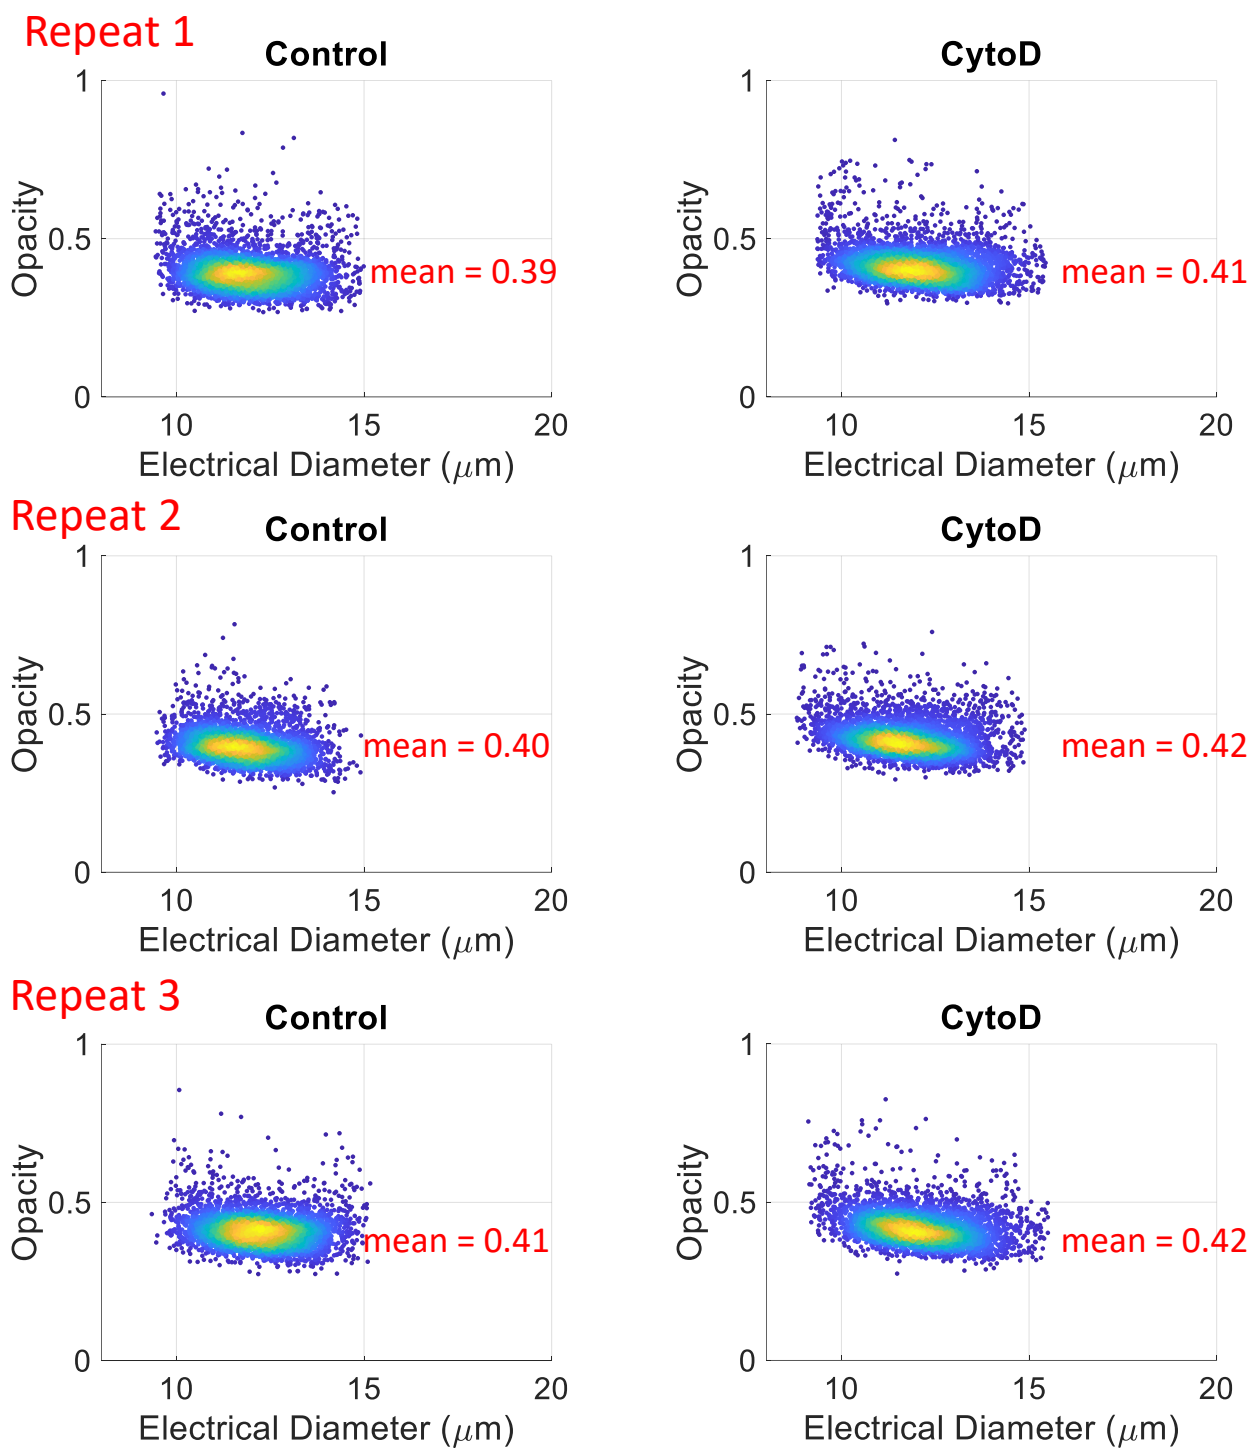

Figure S6. Scatter plots of electrical diameter ( $\sqrt[3]{|Z_{150\text{kHz}}|}$ ) versus opacity ( $|Z_{3\text{MHz}}|/|Z_{150\text{kHz}}|$ ) for control and CytoD treated cells. Data were collected on three different days with separate batches of cells.

(a)

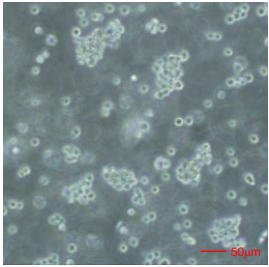

THP-1  
48h

(b)

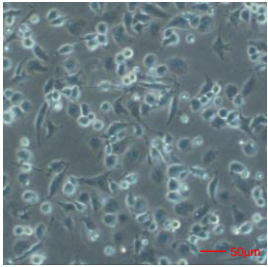

M0  
48h

Figure S7 Images of (a) THP-1 and (b) M0 cells in the culture flasks.

Repeat 2

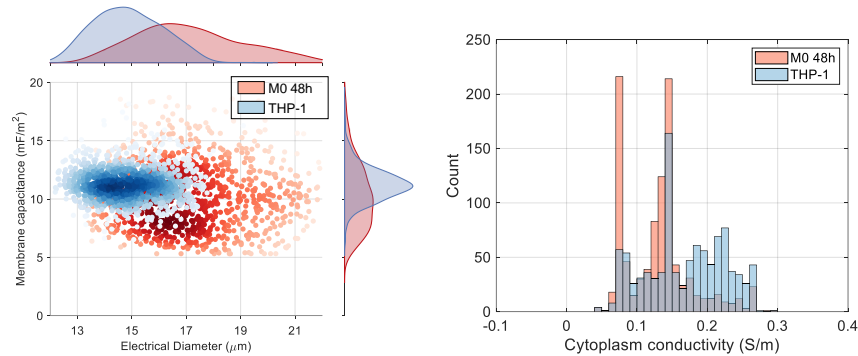

Repeat 3

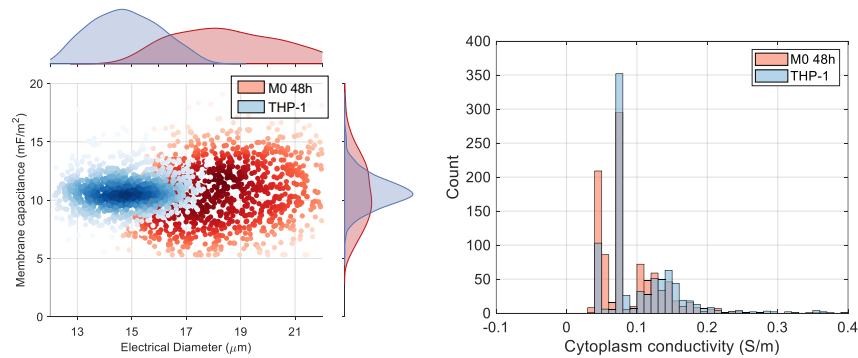

Figure S8. Data for repeats 2 and 3 for THP-1 and differentiated M0 cells.

## References

- [1] Mansoorifar, A., et al., *Accuracy of the Maxwell–Wagner and the Bruggeman–Hanai mixture models for single cell dielectric spectroscopy*. IET Nanobiotechnology, 2017. **11**(7): p. 874-882.
- [2] Irimajiri, A., T. Hanai, and A. Inouye, *A dielectric theory of “multi-stratified shell” model with its application to a lymphoma cell*. Journal of theoretical biology, 1979. 78(2): p. 251-269.
- [3] Spencer, D., Elliott, G., and Morgan, H., *A sheath-less combined optical and impedance micro-cytometer*. Lab Chip, 2014. 14(16): p. 3064-73.
- [4] Spencer, D., Hollis, V., and Morgan, H., *Microfluidic impedance cytometry of tumour cells in blood*. Biomicrofluidics, 2014. 8(6): p. 064124
